# Supplementary material
Source: publisher figshare collection journal article supplement (https://acs.figshare.com/ndownloader/files/15548096)
Supplement: Supplementary file 1 [file 15548096]

***Supplementary Information for***

**Recombinant butelase-mediated cyclization of the p53-binding domain of the oncoprotein**

**MdmX stabilized protein conformation as a promising model for structural investigation**

*Ni Pi<sup>1, #</sup>, Meng Gao<sup>1, #</sup>, Xiyao Cheng<sup>1, 2, #</sup>, Huili Liu<sup>3</sup>, Zhengkun Kuang<sup>1</sup>, Zixin Yang<sup>1</sup>, Jing Yang<sup>1</sup>, Bailing Zhang<sup>1</sup>, Yao Chen<sup>1</sup>, Sen Liu<sup>1</sup>, Yongqi Huang<sup>1, 2, \*</sup> and Zhengding Su<sup>1, 2, \*</sup>*

*<sup>1</sup>Key Laboratory of Industrial Fermentation (Ministry of Education), Hubei Key Laboratory of Industrial Microbiology and Department of Biological and Food Engineering, Hubei University of Technology, Wuhan, 430068, China*

*<sup>2</sup>Wuhan Amersino Biodevelop Inc. B1-Building, Biolake Park, Wuhan, 430075, China <sup>3</sup>National Center for Magnetic Resonance in Wuhan, State Key Laboratory of Magnetic Resonance and Atomic and Molecular Physics, Wuhan Institute of Physics and Mathematics, Chinese Academy of Sciences, Wuhan, Hubei, 430071 China*

**\*Corresponding Authors:** zhengdingsu@hbut.edu.cn or yqhuang@hbut.edu.cn

**Author Contributions:** NP carried out the molecular cloning, protein preparation, ligation reaction; XC and NP performed CD, DSC and ITC assays; XC and HL conducted the NMR analysis; ZK, ZY and J Y performed protein purification; XC and MG did structure calculation; YH, MG and ZS designed the experiments and wrote the paper. Z.S. Y.H. and S. L. conceived of the project.

## **Materials and Methods**

### **Mass spectrometric assay of the molecular weights of eMdmX and cMdmX**

Protein sample from SEC purification was desalted with 1 mL Sep-Pak C18 cartridge. The elution from the cartridge was freeze-dried. The protein powder was dissolved in 50% acetonitrile and mixed with a mass spectrometric solution, which contained 50% acetonitrile and 2% formic acid, in a ratio of 1:1.

The mixture was subjected to ESI-MS analysis using a Thermo Q Exactive mass spectrometer (South-Central University for Nationalities, Wuhan, China).

## RESULTS

**Table S1. Data collection and refinement statistics of N-Mdm2 in complex with nutlin-3a.**

| <b>Data collection</b>                 |                                               |
|----------------------------------------|-----------------------------------------------|
| Space group                            | P2 <sub>1</sub> 2 <sub>1</sub> 2 <sub>1</sub> |
| Cell dimensions (Å)                    | 42.5, 43.0, 54.5                              |
| a, b, c, $\alpha$ , $\beta$ , $\gamma$ | 90.00°, 90.00°, 90.00°                        |
| Resolution (Å)                         | 33.78 – 1.35                                  |
| $R_{\text{merge}}$                     | 0.05                                          |
| $\langle I / \sigma(I) \rangle$        | 2.01 (at 1.35 Å)                              |
| Completeness (%)                       | 100                                           |
| Redundancy                             | 12.1                                          |
| <b>Refinement</b>                      |                                               |
| Resolution (Å)                         | 33.78 – 1.35                                  |
| No. reflections                        | 22471                                         |
| $R_{\text{work}} / R_{\text{free}}$    | 0.226/0.254                                   |
| Number of atoms                        |                                               |
| Protein                                | 1460                                          |
| $B$ -factors                           |                                               |
| Protein                                | 20.2                                          |
| R.m.s. deviations                      |                                               |
| Bond lengths (Å)                       | 0.0240                                        |
| Bond angles (°)                        | 2.314                                         |

**Table S2. Comparison of kinetic parameters of rBTase with native butelase 1**

| <b>Substrate</b> | <b><math>k_{cat}</math> (s<sup>-1</sup>)</b> | <b><math>K_m</math> (μM)</b> | <b><math>k_{cat} / K_m</math> (M<sup>-1</sup> s<sup>-1</sup>)</b> | <b>Data source</b> |
|------------------|----------------------------------------------|------------------------------|-------------------------------------------------------------------|--------------------|
| kB1-NHV          | 2.15 ± 0.08                                  | 223 ± 12                     | 9,641                                                             | This work          |
| kB1-NHV          | 2.28 ± 0.05                                  | 213 ± 10                     | 10,700                                                            | Nguyen et al, 2014 |

Data are means of triplicate experiments ± SD.

**a**

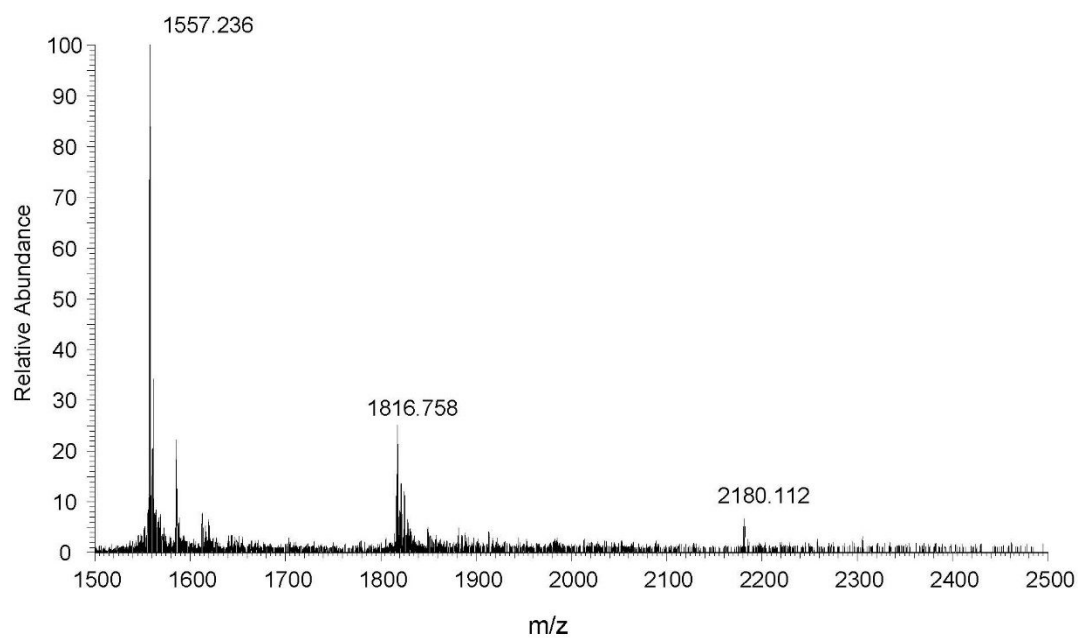

**b**

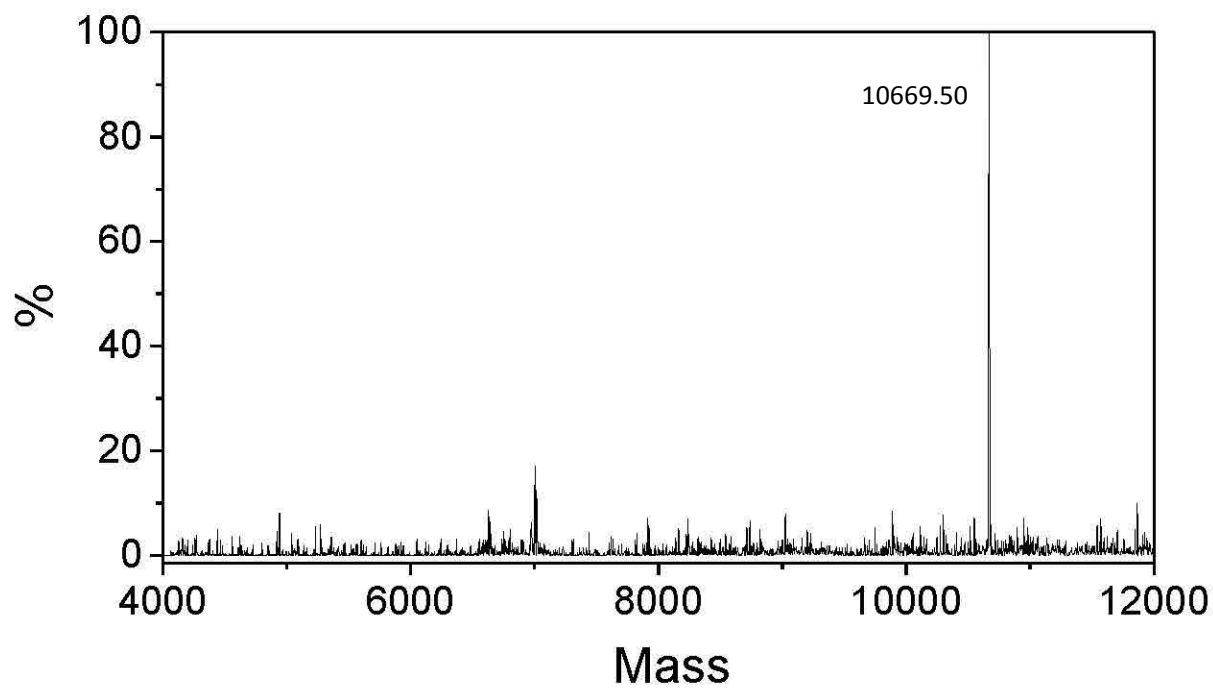

c

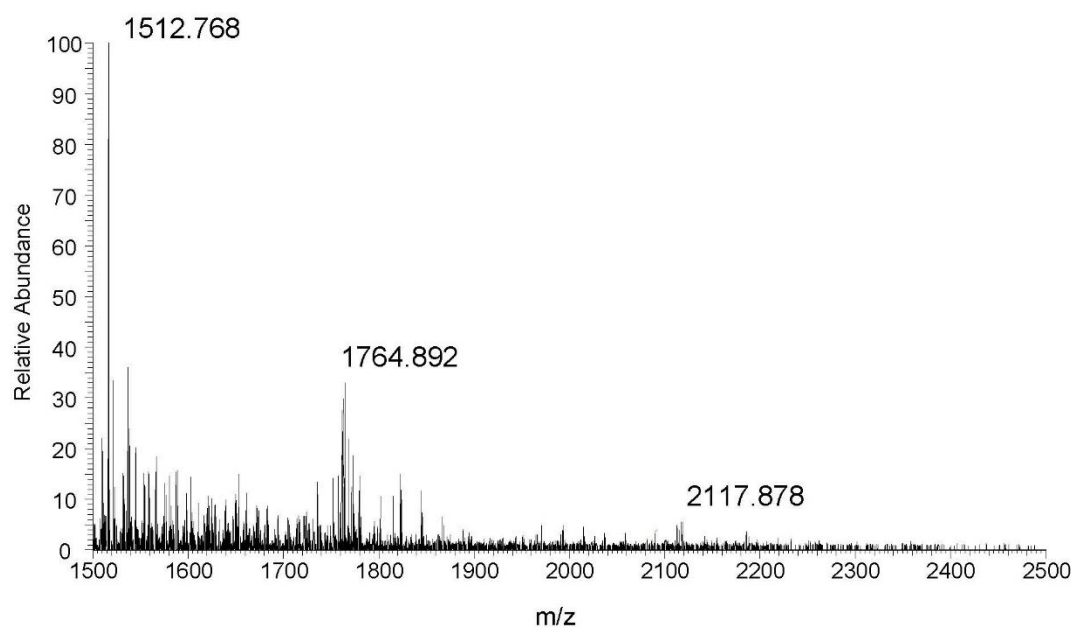

d

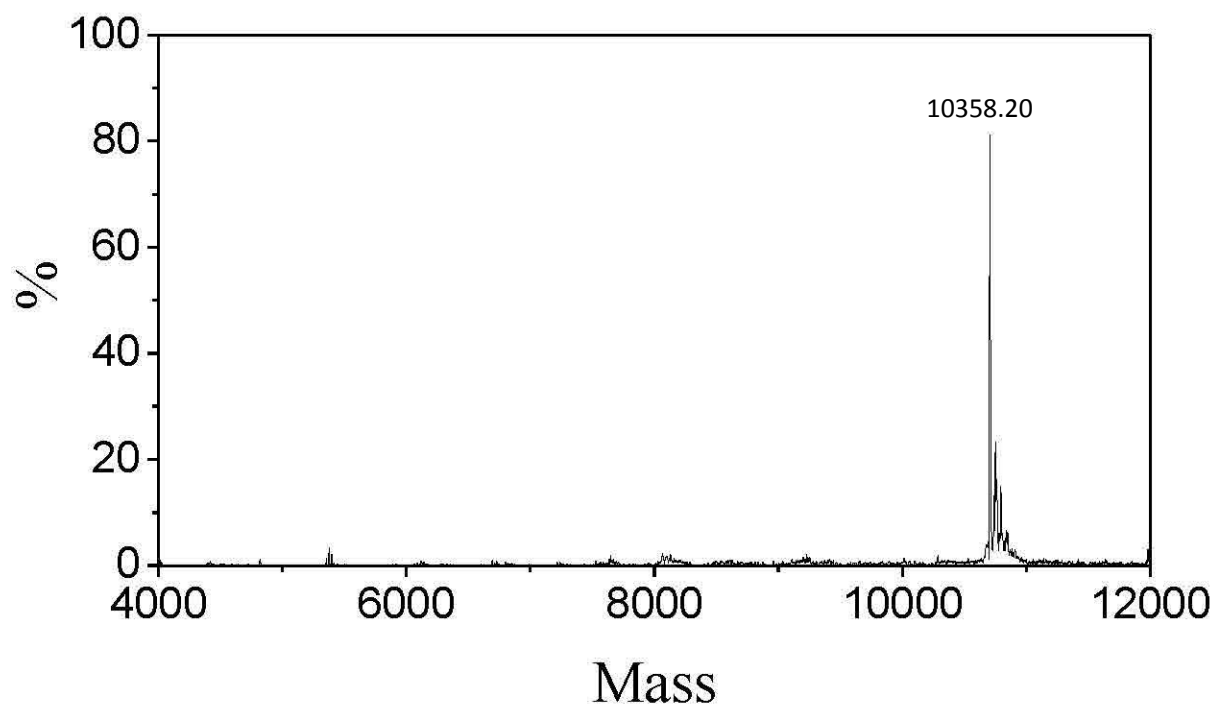

**Figure S1. Mass spectra of eMdmX and cMdmX.** The experimental molecular weights of eMdmX and cMdmX are 10669.45 Dalton and 10358.20 Dalton, respectively, matching their theoretical values. **a.** The mass spectrometric profile of eMdmX; **b.** The deconvolution of the mass spectrometric data of eMdmX. **c.** The mass spectrometric profile of cMdmX; **d.** The deconvolution of the mass spectrometric data of cMdmX.

**Table S3. Summary on thermodynamics parameters of eMdmX and cMdmX during heat denaturation**

|                                    | <b>eMdmX</b> | <b>cMdmX</b> |
|------------------------------------|--------------|--------------|
| <b>T<sub>m</sub> (°C)</b>          | 44           | 47           |
| <b>ΔC<sub>p</sub> (kcal/mol.K)</b> | 2.3          | 2.8          |
| <b>ΔH<sub>cal</sub> (kcal/mol)</b> | 81.5         | 86.9         |
| <b>ΔH<sub>v</sub> (kcal/mol)</b>   | 88.3         | 91.2         |

**Table S4. Summary on the thermodynamics parameters of eMdmX and cMdmX titrated with nutlin-3a**

|                            | <b>eMdmX</b> | <b>cMdmX</b> |
|----------------------------|--------------|--------------|
| <b>n</b>                   | 0.9 ± 0.2    | 1.1 ± 0.2    |
| <b>K<sub>d</sub> ( μM)</b> | 19.3 ± 3.5   | 8.6 ± 2.6    |
| <b>ΔH (kcal/mol)</b>       | -3.3 ± 1.9   | -3.8 ± 1.8   |
| <b>-TΔS (kcal/mol)</b>     | -2.8 ± 1.2   | -3.3 ± 1.7   |

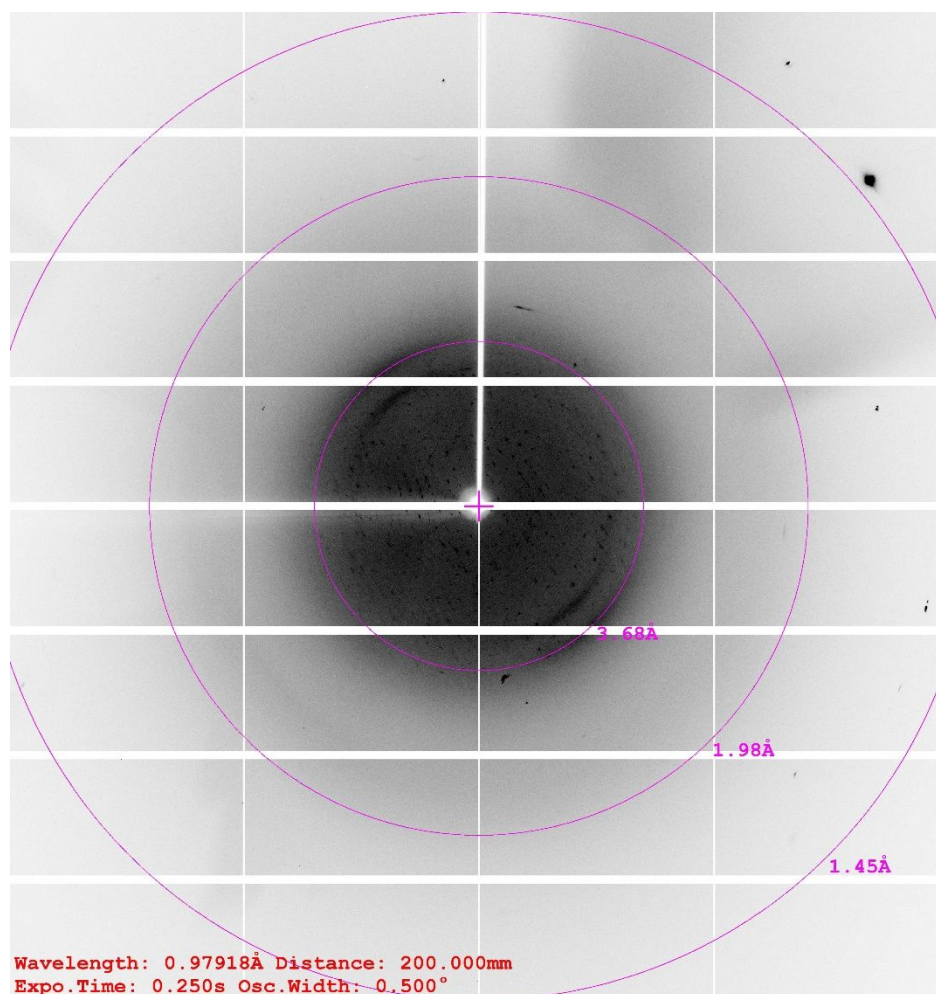

**Figure S2. An X-ray diffraction map of the crystal of cMdmX/nutlin-3 complex.**



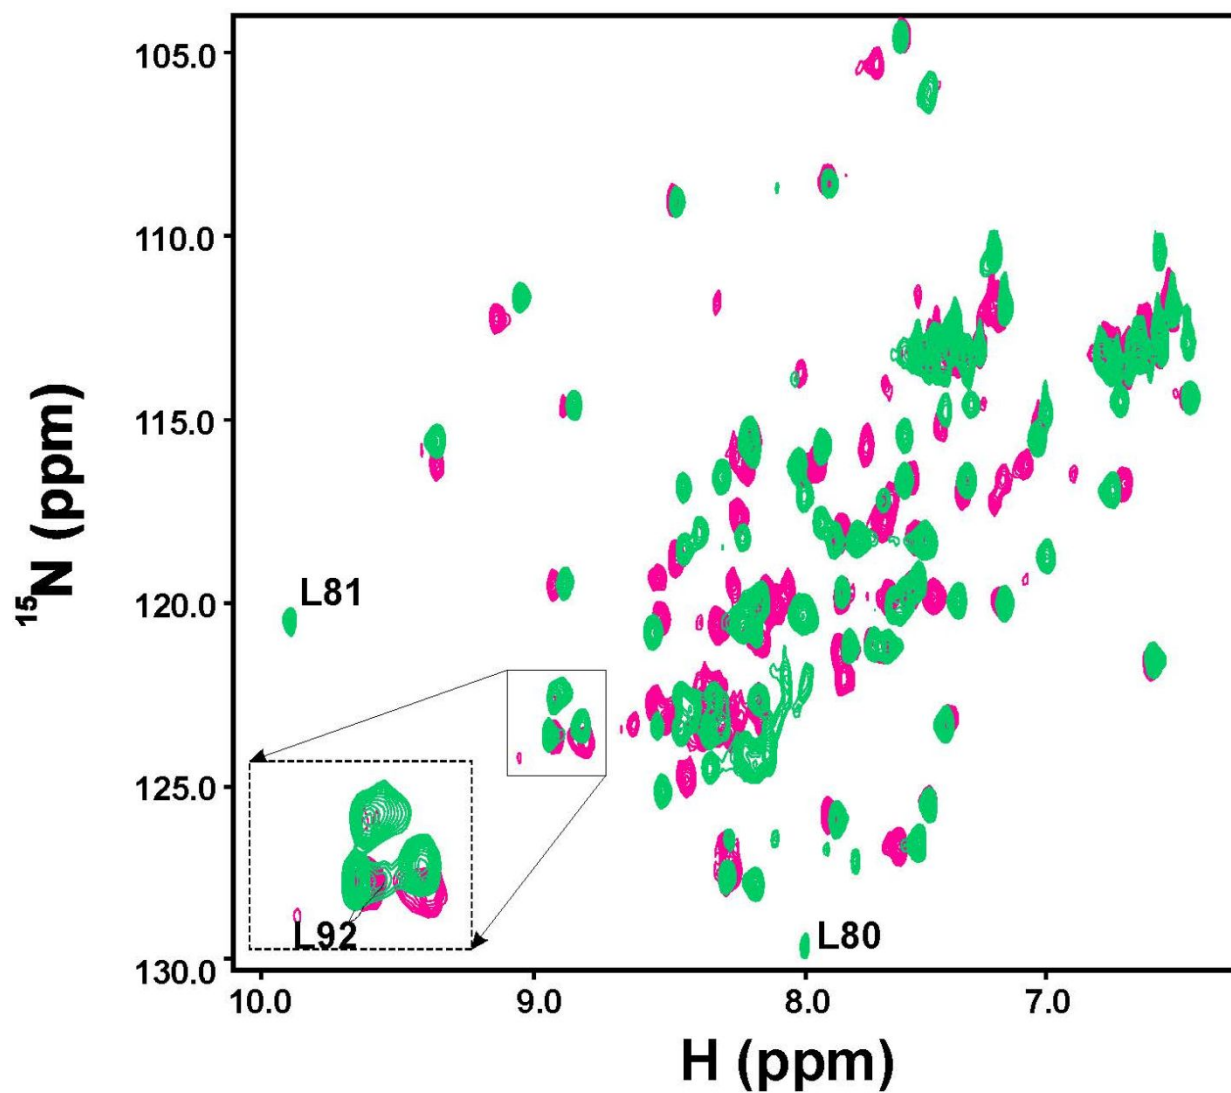

**Figure S3. Effect of cyclization on  $^{15}\text{N}$ - $^1\text{H}$  HSQC NMR spectrum of N-eMdmX.**  $^{15}\text{N}$ - $^1\text{H}$  HSQC spectrum of cMdmX in complex with nutlin-3a (*green*) was superimposed on that of eMdmX in complex with nutlin-3a (*red*). Spectral region around L92 peak was enlarged and deepened for clear view.
